# Supplementary material for: Strong concordance between RNA structural and single nucleotide variants identified via next generation sequencing techniques in primary pediatric leukemia and patient-derived xenograft samples
Source: PubMed Central journal article supplement (PMC7120351; doi:10.5808/gi.2020.18.1.e6), 2020-03-31
Supplement: gi-2020-18-1-e6-suppl1.pdf [file gi-2020-18-1-e6-suppl1.pdf]

|          |       |                |                                                               |                                         |     |     |      |                  |
|----------|-------|----------------|---------------------------------------------------------------|-----------------------------------------|-----|-----|------|------------------|
| NTP1-168 | B-ALL | PDGFRA         | chr4:55139703,chr4:55139704                                   | Exon 10: Intron 9                       | 24% | 24% | 0%   | Retained intron  |
| NTP1-168 | B-ALL | NF1            | chr17:29637630,chr17:29652838                                 | Exon 36: Intron 35                      | 23% | 16% | -7%  | Retained intron  |
| NTP1-168 | B-ALL | BCL3           | chr19:45253362,chr19:45254484                                 | Exon 2: Intron 1                        | 28% | 19% | -9%  | Retained intron  |
| NTP1-168 | B-ALL | CEBPA          | chr19:33792461,chr19:33792515                                 | Exon 8: Exon 1                          | 24% | 53% | 29%  | Exon Duplication |
| NTP1-168 | B-ALL | MTH11          | chr16:15853081,chr16:15841653                                 | Exon 19: Intron 18                      | 78% | 78% | 0%   | Retained intron  |
| NTP1-168 | B-ALL | CEBPA          | chr19:33792461,chr19:33792521                                 | Exon 3: Exon1                           | 21% | 67% | 46%  | Exon Duplication |
| NTP1-216 | B-ALL | BCL11B         | chr14:99723808,chr14:99724176                                 | Exon 2: Exon 2                          | 16% | 10% | -6%  | Exon Duplication |
| NTP1-216 | B-ALL | ZCCHC7         | chr9:37187568,chr9:37302185                                   | Exon 3: Intron 2                        | 27% | 14% | -13% | Retained intron  |
| NTP1-216 | B-ALL | ETV6, U1 RUNX1 | chr12:12022903,chr21:36265260                                 | Exon 5 ETV6: Exon 3 RUNX1               | 30% | 32% | 2%   | Fusion           |
| NTP1-313 | B-ALL | ZCCHC7         | chr9:37187568,chr9:37302185                                   | Exon 3: Intron 2                        | 14% | 17% | 3%   | Retained intron  |
| NTP1-313 | B-ALL | ETV6, U1 RUNX1 | chr12:12022903,chr21:36265260                                 | Exon 5 ETV6: Exon 3 RUNX1 : Exon 3 ETV6 | 44% | 35% | -9%  | Fusion           |
| NTP1-313 | B-ALL | TGFB3          | chr19:1621132, chr19:1621131                                  | Exon 10: Intron 10                      | 25% | 24% | -1%  | Retained intron  |
| NTP1-367 | B-ALL | SETD2          | chr3:47205344,chr3:471681771-cwbr-chr3:47168154,chr3:47168153 | Exon 1: Intron 1: Exon 2                | 18% | 13% | -5%  | Retained intron  |
| NTP1-367 | B-ALL | BCL3           | chr19:45253362,chr19:45254484                                 | Exon 2: Intron 1                        | 49% | 24% | -25% | Retained intron  |
| NTP1-367 | B-ALL | ZCCHC7         | chr9:37147442,chr9:37302185                                   | Exon 3: Intron 2                        | 22% | 15% | -7%  | Retained intron  |
| NTP1-367 | B-ALL | CSF1R          | chr5:149446589,chr5:149441412                                 | Exon 12: Intron 11                      | 65% | 54% | -11% | Retained intron  |
| NTP1-367 | B-ALL | CCND2          | chr12:4399615,chr12:4409026                                   | Exon 5: Intron 4                        | 14% | 33% | 19%  | Retained intron  |
| NTP1-367 | B-ALL | NF1            | chr17:29637630,chr17:29652838                                 | Exon 36: Intron 35                      | 25% | 27% | 2%   | Retained intron  |
