# Supplementary material for: Strong concordance between RNA structural and single nucleotide variants identified via next generation sequencing techniques in primary pediatric leukemia and patient-derived xenograft samples
Source: PubMed Central journal article supplement (PMC7120351; doi:10.5808/gi.2020.18.1.e6), 2020-03-31
Supplement: gi-2020-18-1-e6-suppl2.pdf [file gi-2020-18-1-e6-suppl2.pdf]

| Type  | Sample   | AF_primary | AF_xen | delta   | Gene   | consequence                               |
|-------|----------|------------|--------|---------|--------|-------------------------------------------|
| B-ALL | NTPL-109 | 1          | 1      | 0       | BCL2   | 5_prime_UTR_variant                       |
| B-ALL | NTPL-109 | 1          | 1      | 0       | RUNX1  | 3_prime_UTR_variant                       |
| B-ALL | NTPL-109 | 0.9923     | 0.9511 | -0.0412 | CCND1  | synonymous_variant                        |
| B-ALL | NTPL-119 | 0.3057     | 0.3492 | 0.0435  | FGFR1  | missense_variant                          |
| B-ALL | NTPL-119 | 1          | 1      | 0       | BCL2   | 5_prime_UTR_variant                       |
| B-ALL | NTPL-119 | 0.3279     | 0.3024 | -0.0255 | RUNX1  | synonymous_variant                        |
| B-ALL | NTPL-119 | 0.5556     | 0.3214 | -0.2342 | CHIC2  | 3_prime_UTR_variant                       |
| B-ALL | NTPL-127 | 0.335      | 0.8709 | 0.5359  | NOTCH1 | frameshift_variant&splice_region_variant  |
| B-ALL | NTPL-127 | 0.8571     | 1      | 0.1429  | ABL1   | splice_donor_variant                      |
| B-ALL | NTPL-127 | 0.0237     | 0.0764 | 0.0527  | ETV6   | stop_gained                               |
| B-ALL | NTPL-127 | 0.9697     | 1      | 0.0303  | BCL2   | 5_prime_UTR_variant                       |
| B-ALL | NTPL-127 | 0.5024     | 0.5025 | 1E-04   | CCND3  | missense_variant                          |
| B-ALL | NTPL-127 | 1          | 1      | 0       | CCND2  | 5_prime_UTR_variant                       |
| B-ALL | NTPL-127 | 0.5543     | 0.4439 | -0.1104 | MYC    | 5_prime_UTR_variant                       |
| B-ALL | NTPL-137 | 0.5158     | 1      | 0.4842  | CCND2  | 5_prime_UTR_variant                       |
| B-ALL | NTPL-137 | 1          | 1      | 0       | BCL2   | 5_prime_UTR_variant                       |
| AML   | NTPL-146 | 0.1775     | 0.2394 | 0.0619  | PML    | missense_variant                          |
| AML   | NTPL-146 | 0.7665     | 0.8025 | 0.036   | RAB7A  | 3_prime_UTR_variant                       |
| AML   | NTPL-146 | 0.437      | 0.4682 | 0.0312  | TFG    | missense_variant                          |
| AML   | NTPL-146 | 0.4177     | 0.4469 | 0.0292  | BCL2   | 3_prime_UTR_variant                       |
| AML   | NTPL-146 | 0.1544     | 0.183  | 0.0286  | FOXP1  | splice_region_variant&5_prime_UTR_variant |
| AML   | NTPL-146 | 0.4374     | 0.4519 | 0.0145  | CSF1R  | missense_variant&splice_region_variant    |
| AML   | NTPL-146 | 0.0222     | 0.0301 | 0.0079  | MLLT10 | 5_prime_UTR_variant                       |
| AML   | NTPL-146 | 0.0605     | 0.067  | 0.0065  | MLLT10 | 5_prime_UTR_variant                       |
| AML   | NTPL-146 | 0.3146     | 0.157  | -0.1576 | MYC    | missense_variant                          |
| AML   | NTPL-146 | 0.6466     | 0.4298 | -0.2168 | CCND3  | missense_variant                          |
| B-ALL | NTPL-155 | 0.1994     | 0.4619 | 0.2625  | BCR    | frameshift_variant&splice_region_variant  |
| B-ALL | NTPL-155 | 0.0302     | 0.1015 | 0.0713  | CEBPA  | synonymous_variant                        |
| B-ALL | NTPL-155 | 0.4837     | 0.5487 | 0.065   | NFKB2  | synonymous_variant                        |
| B-ALL | NTPL-155 | 0.3898     | 0.4484 | 0.0586  | NUP98  | missense_variant                          |
| B-ALL | NTPL-155 | 0.0313     | 0.0801 | 0.0488  | CEBPA  | synonymous_variant                        |
| B-ALL | NTPL-155 | 0.494      | 0.5024 | 0.0084  | NOTCH1 | missense_variant                          |
| B-ALL | NTPL-155 | 1          | 1      | 0       | CHIC2  | 3_prime_UTR_variant                       |
| B-ALL | NTPL-155 | 1          | 1      | 0       | RUNX1  | 3_prime_UTR_variant                       |
| B-ALL | NTPL-155 | 0.1782     | 0.0862 | -0.092  | FOXP1  | splice_region_variant&5_prime_UTR_variant |
| B-ALL | NTPL-155 | 0.8654     | 0.3778 | -0.4876 | ABL2   | 5_prime_UTR_variant                       |
| B-ALL | NTPL-164 | 0.8346     | 0.9859 | 0.1513  | CCND1  | synonymous_variant                        |
| B-ALL | NTPL-164 | 0.3125     | 0.4364 | 0.1239  | CREBBP | 5_prime_UTR_variant                       |
| B-ALL | NTPL-164 | 0.5135     | 0.6327 | 0.1192  | SEMA6A | synonymous_variant                        |
| B-ALL | NTPL-164 | 0.8581     | 0.9627 | 0.1046  | CCND1  | synonymous_variant                        |
| B-ALL | NTPL-164 | 0.4029     | 0.4545 | 0.0516  | TFG    | synonymous_variant                        |
| B-ALL | NTPL-164 | 0.6547     | 0.7035 | 0.0488  | MYC    | 5_prime_UTR_variant                       |
| B-ALL | NTPL-164 | 0.5495     | 0.5828 | 0.0333  | JAK2   | synonymous_variant                        |
| B-ALL | NTPL-164 | 0.5119     | 0.5358 | 0.0239  | TCF3   | synonymous_variant                        |
| B-ALL | NTPL-164 | 0.4528     | 0.4613 | 0.0085  | CBFB   | synonymous_variant                        |
| B-ALL | NTPL-164 | 0.4848     | 0.4894 | 0.0046  | ETV6   | missense_variant                          |
| B-ALL | NTPL-164 | 1          | 1      | 0       | BCL2   | 5_prime_UTR_variant                       |
| B-ALL | NTPL-164 | 0.1625     | 0.1371 | -0.0254 | MYC    | synonymous_variant                        |
| B-ALL | NTPL-164 | 0.0866     | 0.0539 | -0.0327 | IKZF1  | missense_variant                          |
| B-ALL | NTPL-164 | 0.5403     | 0.5    | -0.0403 | PDCD1  | synonymous_variant                        |
| B-ALL | NTPL-164 | 0.5608     | 0.4912 | -0.0696 | PAX5   | 5_prime_UTR_variant                       |
| B-ALL | NTPL-168 | 0.4098     | 0.6    | 0.1902  | CCND1  | synonymous_variant                        |
| B-ALL | NTPL-168 | 0.5652     | 0.6923 | 0.1271  | DUSP22 | missense_variant                          |
| B-ALL | NTPL-168 | 0.5729     | 0.6276 | 0.0547  | ABL2   | synonymous_variant                        |

|       |          |        |        |         |        |                                           |
|-------|----------|--------|--------|---------|--------|-------------------------------------------|
| B-ALL | NTPL-168 | 0.4179 | 0.4571 | 0.0392  | JAK2   | synonymous_variant                        |
| B-ALL | NTPL-168 | 0.4837 | 0.5097 | 0.026   | TCF3   | missense_variant                          |
| B-ALL | NTPL-168 | 0.4389 | 0.4597 | 0.0208  | CREBBP | missense_variant                          |
| B-ALL | NTPL-168 | 0.4775 | 0.4788 | 0.0013  | JAK2   | synonymous_variant                        |
| B-ALL | NTPL-168 | 1      | 1      | 0       | BCL2   | 5_prime_UTR_variant                       |
| B-ALL | NTPL-168 | 1      | 0.9965 | -0.0035 | CCND2  | 5_prime_UTR_variant                       |
| B-ALL | NTPL-168 | 0.5022 | 0.4362 | -0.066  | CREBBP | synonymous_variant                        |
| B-ALL | NTPL-168 | 0.5    | 0.4297 | -0.0703 | IRF8   | synonymous_variant                        |
| B-ALL | NTPL-20  | 0.4915 | 0.5745 | 0.083   | PML    | missense_variant                          |
| B-ALL | NTPL-20  | 0.6179 | 0.6977 | 0.0798  | RUNX1  | 5_prime_UTR_variant                       |
| B-ALL | NTPL-20  | 0.4348 | 0.5057 | 0.0709  | FOXP1  | 5_prime_UTR_variant                       |
| B-ALL | NTPL-20  | 0.98   | 1      | 0.02    | CDKN2A | stop_gained                               |
| B-ALL | NTPL-20  | 0.4089 | 0.4148 | 0.0059  | FGFR1  | missense_variant                          |
| B-ALL | NTPL-20  | 0.4159 | 0.4191 | 0.0032  | CCND3  | missense_variant                          |
| B-ALL | NTPL-20  | 1      | 1      | 0       | BCL2   | 5_prime_UTR_variant                       |
| B-ALL | NTPL-20  | 0.4685 | 0.4365 | -0.032  | TYK2   | missense_variant                          |
| B-ALL | NTPL-20  | 0.5158 | 0.4706 | -0.0452 | PDGFRB | missense_variant                          |
| B-ALL | NTPL-216 | 0.9907 | 0.9964 | 0.0057  | FOXP1  | 5_prime_UTR_variant                       |
| B-ALL | NTPL-216 | 0.6    | 0.4948 | -0.1052 | BCL2   | 5_prime_UTR_variant                       |
| B-ALL | NTPL-216 | 0.4293 | 0.3208 | -0.1085 | ERG    | synonymous_variant                        |
| B-ALL | NTPL-26  | 0.6558 | 0.8623 | 0.2065  | CCND1  | synonymous_variant                        |
| B-ALL | NTPL-26  | 0.8333 | 1      | 0.1667  | MLF1   | 5_prime_UTR_variant                       |
| B-ALL | NTPL-26  | 0.7081 | 0.8645 | 0.1564  | CCND1  | synonymous_variant                        |
| B-ALL | NTPL-26  | 0.022  | 0.0029 | -0.0191 | TCF3   | missense_variant                          |
| B-ALL | NTPL-26  | 0.3308 | 0.1126 | -0.2182 | FOXP1  | splice_region_variant&5_prime_UTR_variant |
| T-ALL | NTPL-300 | 0.3684 | 0.5272 | 0.1588  | BCL2   | 5_prime_UTR_variant                       |
| T-ALL | NTPL-300 | 0.3797 | 0.5    | 0.1203  | TYK2   | missense_variant                          |
| T-ALL | NTPL-300 | 0.5543 | 0.568  | 0.0137  | NOTCH1 | missense_variant                          |
| T-ALL | NTPL-300 | 0.3957 | 0.404  | 0.0083  | IKZF1  | missense_variant                          |
| T-ALL | NTPL-300 | 0.8333 | 0.6214 | -0.2119 | CHD1   | 5_prime_UTR_variant                       |
| AML   | NTPL-301 | 0.4775 | 0.5877 | 0.1102  | ZCCHC7 | 5_prime_UTR_variant                       |
| AML   | NTPL-301 | 0.3931 | 0.5    | 0.1069  | TYK2   | missense_variant                          |
| AML   | NTPL-301 | 0.4889 | 0.5704 | 0.0815  | BCL2   | 3_prime_UTR_variant                       |
| AML   | NTPL-301 | 0.4535 | 0.4554 | 0.0019  | MUC1   | missense_variant                          |
| AML   | NTPL-301 | 1      | 1      | 0       | CCND2  | 5_prime_UTR_variant                       |
| AML   | NTPL-301 | 1      | 1      | 0       | ABL1   | splice_donor_variant                      |
| AML   | NTPL-301 | 0.5071 | 0.5047 | -0.0024 | CCND3  | missense_variant                          |
| AML   | NTPL-301 | 0.1097 | 0.065  | -0.0447 | MLLT10 | 5_prime_UTR_variant                       |
| B-ALL | NTPL-313 | 0.9375 | 1      | 0.0625  | BCL2   | 5_prime_UTR_variant                       |
| B-ALL | NTPL-313 | 0.9857 | 0.995  | 0.0093  | CCND2  | 5_prime_UTR_variant                       |
| B-ALL | NTPL-313 | 1      | 1      | 0       | BCL2   | 5_prime_UTR_variant                       |
| B-ALL | NTPL-313 | 1      | 1      | 0       | RUNX1  | 3_prime_UTR_variant                       |
| B-ALL | NTPL-313 | 0.5462 | 0.5087 | -0.0375 | PAX5   | missense_variant                          |
| B-ALL | NTPL-313 | 0.4444 | 0.3983 | -0.0461 | NOTCH1 | missense_variant                          |
| B-ALL | NTPL-313 | 0.5296 | 0.457  | -0.0726 | NOTCH1 | synonymous_variant                        |
| B-ALL | NTPL-367 | 0.8481 | 0.985  | 0.1369  | CCND1  | synonymous_variant                        |
| B-ALL | NTPL-367 | 0.8614 | 0.9781 | 0.1167  | CCND1  | synonymous_variant                        |
| B-ALL | NTPL-367 | 0.3265 | 0.3923 | 0.0658  | PAX5   | missense_variant                          |
| B-ALL | NTPL-367 | 1      | 1      | 0       | IKZF3  | 3_prime_UTR_variant                       |
| B-ALL | NTPL-367 | 1      | 1      | 0       | BCL2   | 5_prime_UTR_variant                       |
| B-ALL | NTPL-367 | 1      | 1      | 0       | BCL2   | 5_prime_UTR_variant                       |
| B-ALL | NTPL-367 | 1      | 1      | 0       | RUNX1  | 3_prime_UTR_variant                       |
| B-ALL | NTPL-367 | 1      | 0.9994 | -0.0006 | CDKN2A | 3_prime_UTR_variant                       |
| B-ALL | NTPL-367 | 0.4835 | 0.4704 | -0.0131 | PAX5   | missense_variant                          |
| B-ALL | NTPL-367 | 0.413  | 0.399  | -0.014  | FOXP1  | missense_variant                          |

|       |          |        |        |         |        |                                           |
|-------|----------|--------|--------|---------|--------|-------------------------------------------|
| B-ALL | NTPL-367 | 0.5376 | 0.4929 | -0.0447 | PAX5   | 3_prime_UTR_variant                       |
| B-ALL | NTPL-367 | 0.1995 | 0.1464 | -0.0531 | FOXP1  | splice_region_variant&5_prime_UTR_variant |
| B-ALL | NTPL-367 | 0.581  | 0.4754 | -0.1056 | IRF8   | synonymous_variant                        |
| B-ALL | NTPL-367 | 0.6571 | 0.5161 | -0.141  | ABL2   | 5_prime_UTR_variant                       |
| AML   | NTPL-377 | 0.4375 | 0.7475 | 0.31    | CDKN2A | 3_prime_UTR_variant                       |
| AML   | NTPL-377 | 0.9355 | 1      | 0.0645  | CHIC2  | 3_prime_UTR_variant                       |
| AML   | NTPL-377 | 0.9918 | 0.9978 | 0.006   | CCND2  | 5_prime_UTR_variant                       |
| AML   | NTPL-377 | 0.4848 | 0.4872 | 0.0024  | NOTCH1 | 3_prime_UTR_variant                       |
| AML   | NTPL-377 | 1      | 1      | 0       | BCL2   | 5_prime_UTR_variant                       |
| AML   | NTPL-377 | 1      | 1      | 0       | RUNX1  | 3_prime_UTR_variant                       |
| AML   | NTPL-377 | 1      | 1      | 0       | MECOM  | 5_prime_UTR_variant                       |
| AML   | NTPL-377 | 0.5298 | 0.4854 | -0.0444 | ETV6   | missense_variant                          |
| AML   | NTPL-377 | 0.4526 | 0.2821 | -0.1705 | ABL2   | 5_prime_UTR_variant                       |
| T-ALL | NTPL-454 | 0.9778 | 1      | 0.0222  | NOTCH1 | 3_prime_UTR_variant                       |
| T-ALL | NTPL-454 | 0.5652 | 0.5784 | 0.0132  | RAB7A  | 3_prime_UTR_variant                       |
| T-ALL | NTPL-454 | 1      | 1      | 0       | BCL2   | 5_prime_UTR_variant                       |
| T-ALL | NTPL-454 | 1      | 1      | 0       | BCL2   | 5_prime_UTR_variant                       |
| T-ALL | NTPL-454 | 1      | 1      | 0       | RUNX1  | 3_prime_UTR_variant                       |
| T-ALL | NTPL-454 | 0.0669 | 0.0493 | -0.0176 | MLLT10 | 5_prime_UTR_variant                       |
| T-ALL | NTPL-454 | 0.481  | 0.4364 | -0.0446 | RAB7A  | 3_prime_UTR_variant                       |
| T-ALL | NTPL-454 | 0.4124 | 0.3623 | -0.0501 | RAB7A  | 3_prime_UTR_variant                       |
| T-ALL | NTPL-454 | 0.4789 | 0.4286 | -0.0503 | RAB7A  | 3_prime_UTR_variant                       |
| T-ALL | NTPL-454 | 0.2478 | 0.1589 | -0.0889 | IKZF1  | missense_variant                          |
| AML   | NTPL-511 | 0.2381 | 0.604  | 0.3659  | MYC    | 5_prime_UTR_variant                       |
| AML   | NTPL-511 | 0.3171 | 0.4567 | 0.1396  | TCF3   | missense_variant                          |
| AML   | NTPL-511 | 0.4528 | 0.3913 | -0.0615 | CCND3  | missense_variant                          |
| T-ALL | NTPL-59  | 0.2111 | 0.8439 | 0.6328  | CEBPA  | missense_variant                          |
| T-ALL | NTPL-59  | 0.325  | 0.8889 | 0.5639  | CEBPA  | missense_variant                          |
| T-ALL | NTPL-59  | 0.7083 | 0.9262 | 0.2179  | CEBPA  | missense_variant                          |
| T-ALL | NTPL-59  | 0.7083 | 0.9262 | 0.2179  | CEBPA  | missense_variant                          |
| T-ALL | NTPL-59  | 0.5    | 0.6212 | 0.1212  | CEBPA  | frameshift_variant                        |
| T-ALL | NTPL-59  | 1      | 1      | 0       | BCL2   | 5_prime_UTR_variant                       |
| T-ALL | NTPL-59  | 1      | 1      | 0       | RUNX1  | 3_prime_UTR_variant                       |
| T-ALL | NTPL-59  | 1      | 1      | 0       | CHIC2  | 3_prime_UTR_variant                       |
| T-ALL | NTPL-59  | 1      | 0.9857 | -0.0143 | CEBPA  | frameshift_variant                        |
| T-ALL | NTPL-59  | 0.8241 | 0.3362 | -0.4879 | NOTCH1 | frameshift_variant&splice_region_variant  |
| AML   | NTPL-706 | 0.111  | 0.4521 | 0.3411  | NOTCH1 | frameshift_variant&splice_region_variant  |
| B-ALL | NTPL-796 | 0.3204 | 0.405  | 0.0846  | MYC    | 5_prime_UTR_variant                       |
| B-ALL | NTPL-796 | 0.1773 | 0.2535 | 0.0762  | FOXP1  | splice_region_variant&5_prime_UTR_variant |
| B-ALL | NTPL-796 | 0.9796 | 1      | 0.0204  | ABL2   | 5_prime_UTR_variant                       |
| B-ALL | NTPL-796 | 1      | 1      | 0       | CCND2  | 5_prime_UTR_variant                       |
| B-ALL | NTPL-84  | 0.4134 | 0.4316 | 0.0182  | CBFB   | synonymous_variant                        |
| B-ALL | NTPL-84  | 0.5    | 0.5063 | 0.0063  | NOTCH1 | missense_variant                          |
| B-ALL | NTPL-84  | 1      | 1      | 0       | BCL2   | 5_prime_UTR_variant                       |
| B-ALL | NTPL-84  | 0.0119 | 0.0041 | -0.0078 | RUNX1  | 5_prime_UTR_variant                       |
| B-ALL | NTPL-84  | 0.4653 | 0.4474 | -0.0179 | TYK2   | missense_variant                          |
| B-ALL | NTPL-84  | 0.4333 | 0.3988 | -0.0345 | VCP    | synonymous_variant                        |
| B-ALL | NTPL-84  | 0.7527 | 0.4915 | -0.2612 | CHD1   | 5_prime_UTR_variant                       |
| B-ALL | NTPL-87  | 0.2614 | 0.4071 | 0.1457  | NOTCH1 | frameshift_variant&splice_region_variant  |
| B-ALL | NTPL-87  | 0.9032 | 1      | 0.0968  | KAT6A  | frameshift_variant&splice_region_variant  |
| B-ALL | NTPL-87  | 0.0774 | 0.1226 | 0.0452  | MLLT10 | 5_prime_UTR_variant                       |
| B-ALL | NTPL-87  | 1      | 1      | 0       | BCL2   | 5_prime_UTR_variant                       |
| B-ALL | NTPL-87  | 1      | 1      | 0       | BCL2   | 5_prime_UTR_variant                       |
| B-ALL | NTPL-87  | 0.9904 | 0.9893 | -0.0011 | TCF3   | missense_variant                          |
| B-ALL | NTPL-90  | 0.4544 | 0.4957 | 0.0413  | MLLT10 | 5_prime_UTR_variant                       |

|       |         |        |        |         |      |                     |
|-------|---------|--------|--------|---------|------|---------------------|
| B-ALL | NTPL-90 | 1      | 1      | 0       | BCL2 | 5_prime_UTR_variant |
| B-ALL | NTPL-90 | 0.3455 | 0.2993 | -0.0462 | BCL2 | 3_prime_UTR_variant |
| B-ALL | NTPL-90 | 0.3388 | 0.2568 | -0.082  | BCL2 | 3_prime_UTR_variant |
| B-ALL | NTPL-92 | 1      | 1      | 0       | BCL2 | 5_prime_UTR_variant |
| B-ALL | NTPL-92 | 0.3068 | 0.1998 | -0.107  | PAX5 | missense_variant    |
| B-ALL | NTPL-92 | 0.3875 | 0.2455 | -0.142  | PAX5 | missense_variant    |
